# Supplementary material for: Hijacking the Hijackers: Escherichia coli Pathogenicity Islands Redirect Helper Phage Packaging for Their Own Benefit
Source: PubMed Central journal article supplement (PMC6739421; doi:10.1016/j.molcel.2019.06.017), 2019-09-05
Supplement: mmc1.pdf [file mmc1.pdf]

**Molecular Cell, Volume 75**

**Supplemental Information**

**Hijacking the Hijackers: *Escherichia coli***

**Pathogenicity Islands Redirect Helper Phage**

**Packaging for Their Own Benefit**

**Alfred Fillol-Salom, Julio Bacarizo, Mohammed Alqasmi, J. Rafael Ciges-Tomas, Roser Martínez-Rubio, Aleksander W. Roszak, Richard J. Cogdell, John Chen, Alberto Marina, and José R. Penadés**

**A****Phage  $\lambda$** 

TTTACGGGTCTTTCCGGTGATCCGACAGTTACGGGGCGGCACCTCGCGGGTTTTTCGCTATTTATGAAAATTTTCCGGTTAAGCGTTTCCGTTCTTCTTCGCATA  
 ACTTAATGTTTTATTTAAATACCTCTGAAAAGAAAGGAAACGACAGGTGCTGAAAGCGAGGCTTTTGGCCTCTGTCGTTTCCCTTCTCTGTTTTGTCCGTGGAAT

**Phage 80**

TTTACGGGTCTTTCCGGCGATCCGCCTTGTACGGGGCGGCACCTCGCAGATTCTCGCTATTTATGAAAATTTTCCAGGATTTGCCGTTTCCGTTCTTCTTCGCATA  
 ATTCATTGTTTTAACTGTAACACCCCTGAAAAGAAAGGAAATGATAAGCCTTAAAACGGCTAAATAGCCAGAGGGCGTTTCCCTTCTCTGTTTTGTGTATGGAGTG

**EcCICFT073 *cos1***

TTTATGGGTCTTTCCGGCATATGGACCCGTTACGGGGCGGCACCTCGCGGGTTTTTCGCTATTTATGACGTTTTTCCGTGAAGGTGACACCACCACCACCTGATTAATA  
 TTTAACCATGCAGTTAAGGTAACATTATGATTGATAAAGCTTGTTTTGTAGTCAGCAGGAAATAGCTGAACATTTCAAGTTAACAGAACCACCTATTCCGCGCATGGACC

**EcCICFT073 *cos2***

TCGTCGGGTCTTCTCGAATTATGGCCCGTTACGGGGCGGCACCTCGCGGGTTTTTCACATTTATGAAAATTTTCCGGATCCATGTCGGGTTTCTCTGCAAGTTAAC  
 CATATGAAAATATAAAAACATGCTTCCATGAACCGGACATGCGCAAAAACAGACACTAAAACCGGACATCGAACAGTTAACGAAAGTGTGCACAAATCACATGCA

**cosQ** = TTTACGGGTCTTTCC**cosB** = **R3** = AAGCGTTTCCGTTCT**cosN** = GGGGCGGCACCT**R2** = AGAAAGGAAACGACAG**R1** = CTGTCGTTTCCCTTCT**B****1 kb**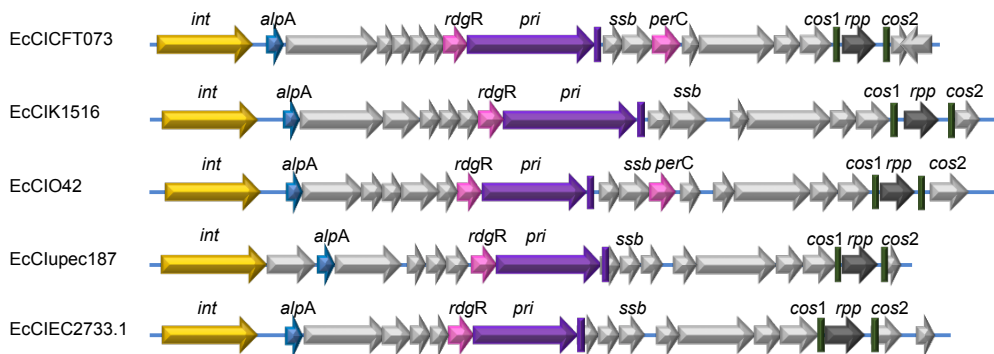**C**

Unconserved 1 2 3 4 5 6 7 8 9 10 Conserved

|             |            |            |            |            |            |
|-------------|------------|------------|------------|------------|------------|
|             | 10         | 20         | 30         | 40         | 50         |
| RppA        | MIDKACFVSQ | QEIAEHFKVN | RTTIRAWTKQ | GMPYLNADRG | KSGGYHIGHT |
| RppB        | MNNKDCFVSQ | QEIAEHFKVN | RTTIRAWTKQ | GMPYLDADRG | KSGGYHIGHT |
| Consistency | 15         | 23         | 33         | 43         | 53         |

  

|             |             |            |            |            |           |
|-------------|-------------|------------|------------|------------|-----------|
|             | 60          | 70         | 80         | 90         | 100       |
| RppA        | LLWSSGKSRLL | EATRYHVETS | ALEKIMFARL | LSSERDEYSS | EETEHRFDG |
| RppB        | LFWCMGKSHL  | DAIEYHGETS | ALEKIMVARL | ISLERDEYFS | EETEQRFDG |
| Consistency | 4           | 23         | 33         | 43         | 53        |

  

|             |           |            |            |            |        |
|-------------|-----------|------------|------------|------------|--------|
|             | 110       | 120        | 130        | 140        |        |
| RppA        | LQIYGSPED | VSKARNKMAG | FLAGWRHAVS | VRRASMEQSA | DTEQ-- |
| RppB        | LQIYGSPED | VSKARNKMAG | FLAGWRHAVA | IRREHLQQSV | VTEQEN |
| Consistency | 8         | 33         | 37         | 6          | 5      |

**D**

|             |            |            |            |            |            |
|-------------|------------|------------|------------|------------|------------|
|             | 10         | 20         | 30         | 40         | 50         |
| RppA        | MIDKACFVSQ | QEIAEHFKVN | RTTIRAWTKQ | GMPYLNADRG | KSGGYHIGHT |
| RppC        | MSENEFELSQ | QEIAEQFGVD | RTTVRAWTKR | GLPFIEGDKG | KPGRYQLGHV |
| Consistency | 26         | 31         | 36         | 43         | 53         |

  

|             |             |             |            |            |            |
|-------------|-------------|-------------|------------|------------|------------|
|             | 60          | 70          | 80         | 90         | 100        |
| RppA        | LLWSSGKSRLL | EATRYHVETS  | ALEKIMFARL | LSSERDEYSS | EETEHRFDG  |
| RppC        | LFWVRGQEGE  | KEILGTMTELH | PLDCIMHSRE | TMLSMVGEDE | DKQRYEKKFN |
| Consistency | 4           | 23          | 33         | 43         | 53         |

  

|             |            |            |            |            |           |
|-------------|------------|------------|------------|------------|-----------|
|             | 110        | 120        | 130        | 140        | 150       |
| RppA        | EGLQIYGSP  | EDVSKARNKM | AFLAGWRHA  | VSVRRASM-E | QSADTEQ-- |
| RppC        | RGLIEIYGSP | DETAQARGRA | QIEIGRELTL | LKRKKKHTNE | NKKRKLIRQ |
| Consistency | 5          | 6          | 6          | 6          | 6         |

  

|             |     |
|-------------|-----|
| RppA        | --- |
| RppC        | NDT |
| Consistency | 0 0 |

**Figure S1. *cos* and Rpp sequences. Related to Figures 1 and S2 and Table S1.**

(A) Sequence of the *cos* regions from phages  $\lambda$  and 80 and from the EcCICFT073 element. While all the elements carry the same *cosQ* and *cosN* sequences, the EcCICFT073 PIC1 *cosB* sequences are completely divergent.

(B) Genome maps for *E. coli* PICs encoding *rpp* genes. Genomes are aligned according to the prophage convention, with the integrase gene (*int*) at the left end. Genes are coloured according to their function: *int* is yellow; transcription regulator (*alpA*) is dark blue; replication genes (*pri*) are purple; redirecting phage packaging genes (*rpp*) are grey; virulence genes are pink; other accessory genes are red; genes encoding hypothetical proteins are white. *cos* sites are indicated as green rectangles.

(C-D) Rpp homologues in *E. coli* PICs. Protein sequence alignment of RppA and RppB (C) or RppA and RppC (D), generated using the PRALINE server. Colours indicate relative sequence conservation at each position, with red being most conserved and blue least.

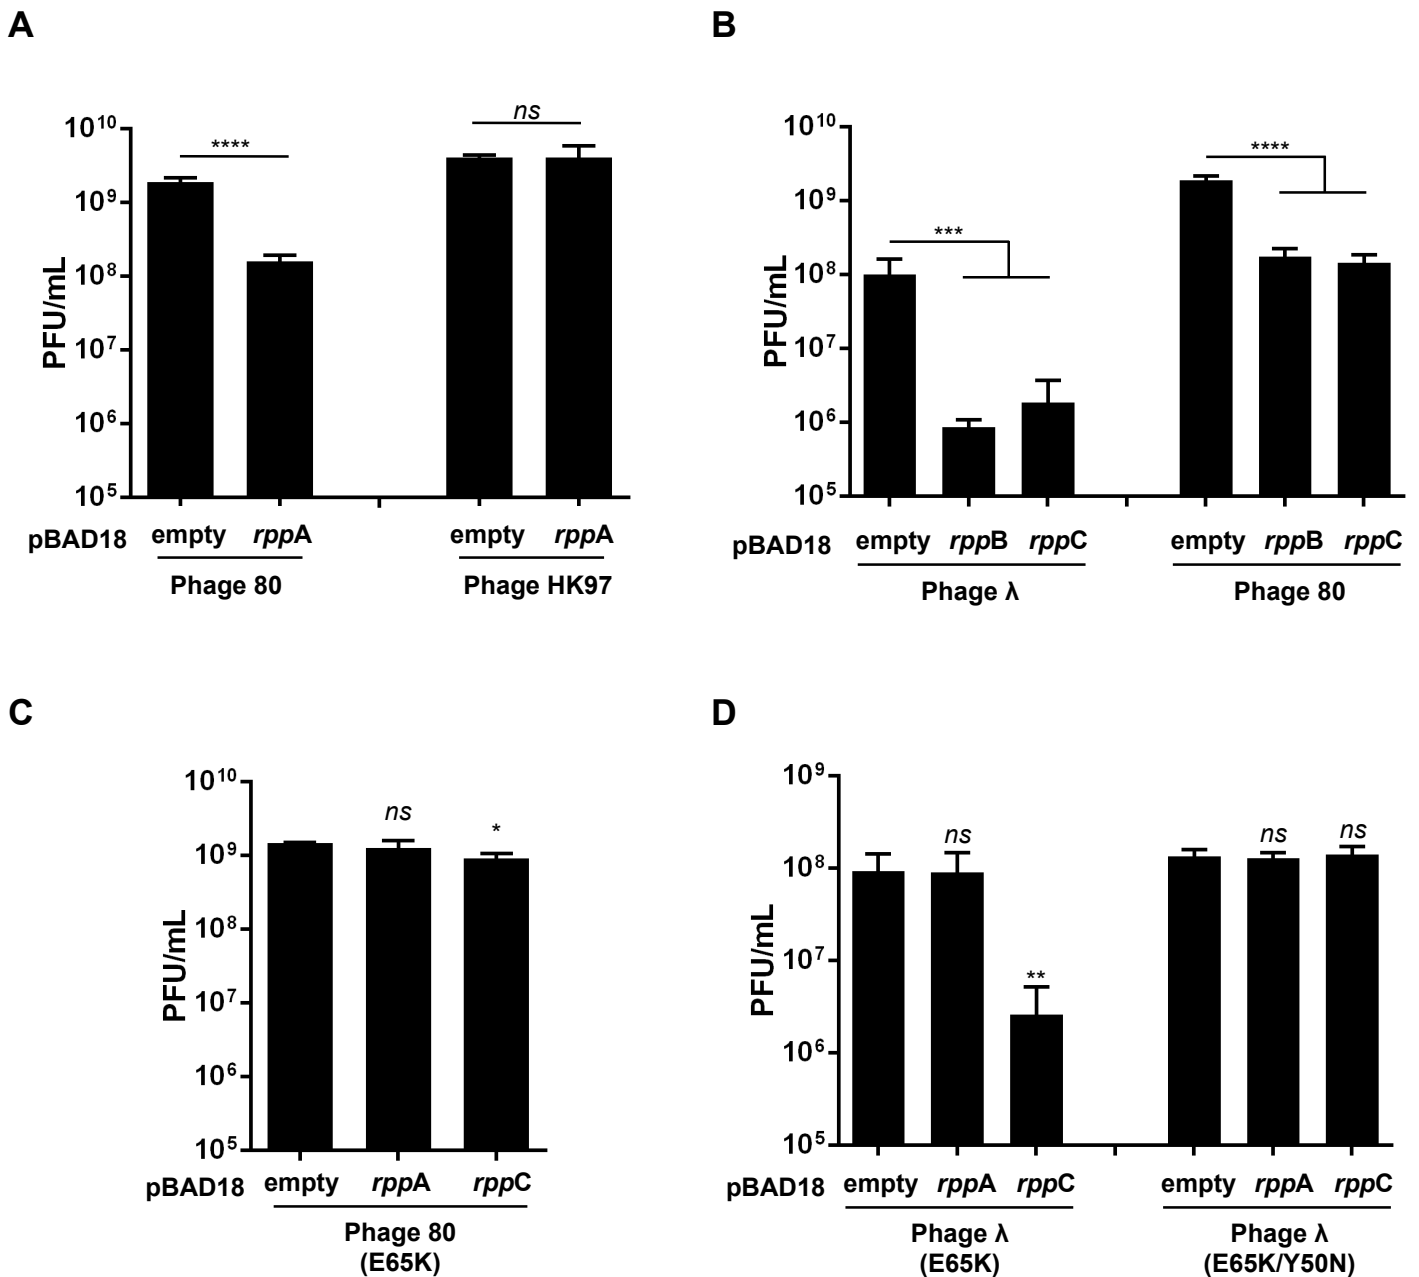

**Figure S2. The Rpp homologues block helper phage reproduction. Related to Figures 1, 2 and S1.**

(A) *E. coli* strain 594 expressing RppA from plasmid pBAD18 was infected with phages 80 or HK97 and plated on phage base agar plates supplemented with 0.1% arabinose using phage top agar. Plates were incubated for 24 h at 37°C and the number of phage plaques were quantified. The means and standard deviation from three independent experiments are presented (n=3). An unpaired t-test was performed to compare mean differences within rows. Adjusted *p* values were as follows:  $p < 0.0001^{****}$ . *ns*, not significant.

(B) *E. coli* strain 594 containing different pBAD18 derivatives was infected with phage lambda or phage 80 and plated on phage base agar plates supplemented with 0.1% arabinose using phage top agar. Plates were incubated for 24 h at 37°C and the number of phage plaques quantified. The means of results and standard deviation from three independent experiments are presented (n=3). A 1-way ANOVA with Dunnett's multiple comparisons test was performed to compare mean differences between pBAD18 empty row. Adjusted *p* values were as follows: λ: empty vs *rppB*  $p = 0.0003^{***}$ , empty vs *rppC*  $p = 0.0005^{***}$ ,  $p < 0.0001^{****}$ .

(C-D) Phage 80 and λ mutants insensitive to the RppA and RppC interference. *E. coli* strain 594 containing different pBAD18 derivatives was infected with the evolved phage 80 carrying the TerS E65K mutation (C) or with evolved λ mutants (TerS E65K or E65K/Y50N; D) and plated on phage base agar plates supplemented with 0.1% arabinose using phage top agar. Plates were incubated for 24 h at 37°C. The means of results and standard deviation from three independent experiments are presented (n=3). A 1-way ANOVA with Dunnett's multiple comparisons test was performed to compare mean differences between samples. Adjusted *p* values were as follows:  $p = 0.0337^*$ ,  $p = 0.0010^{**}$ . *ns*, not significant.

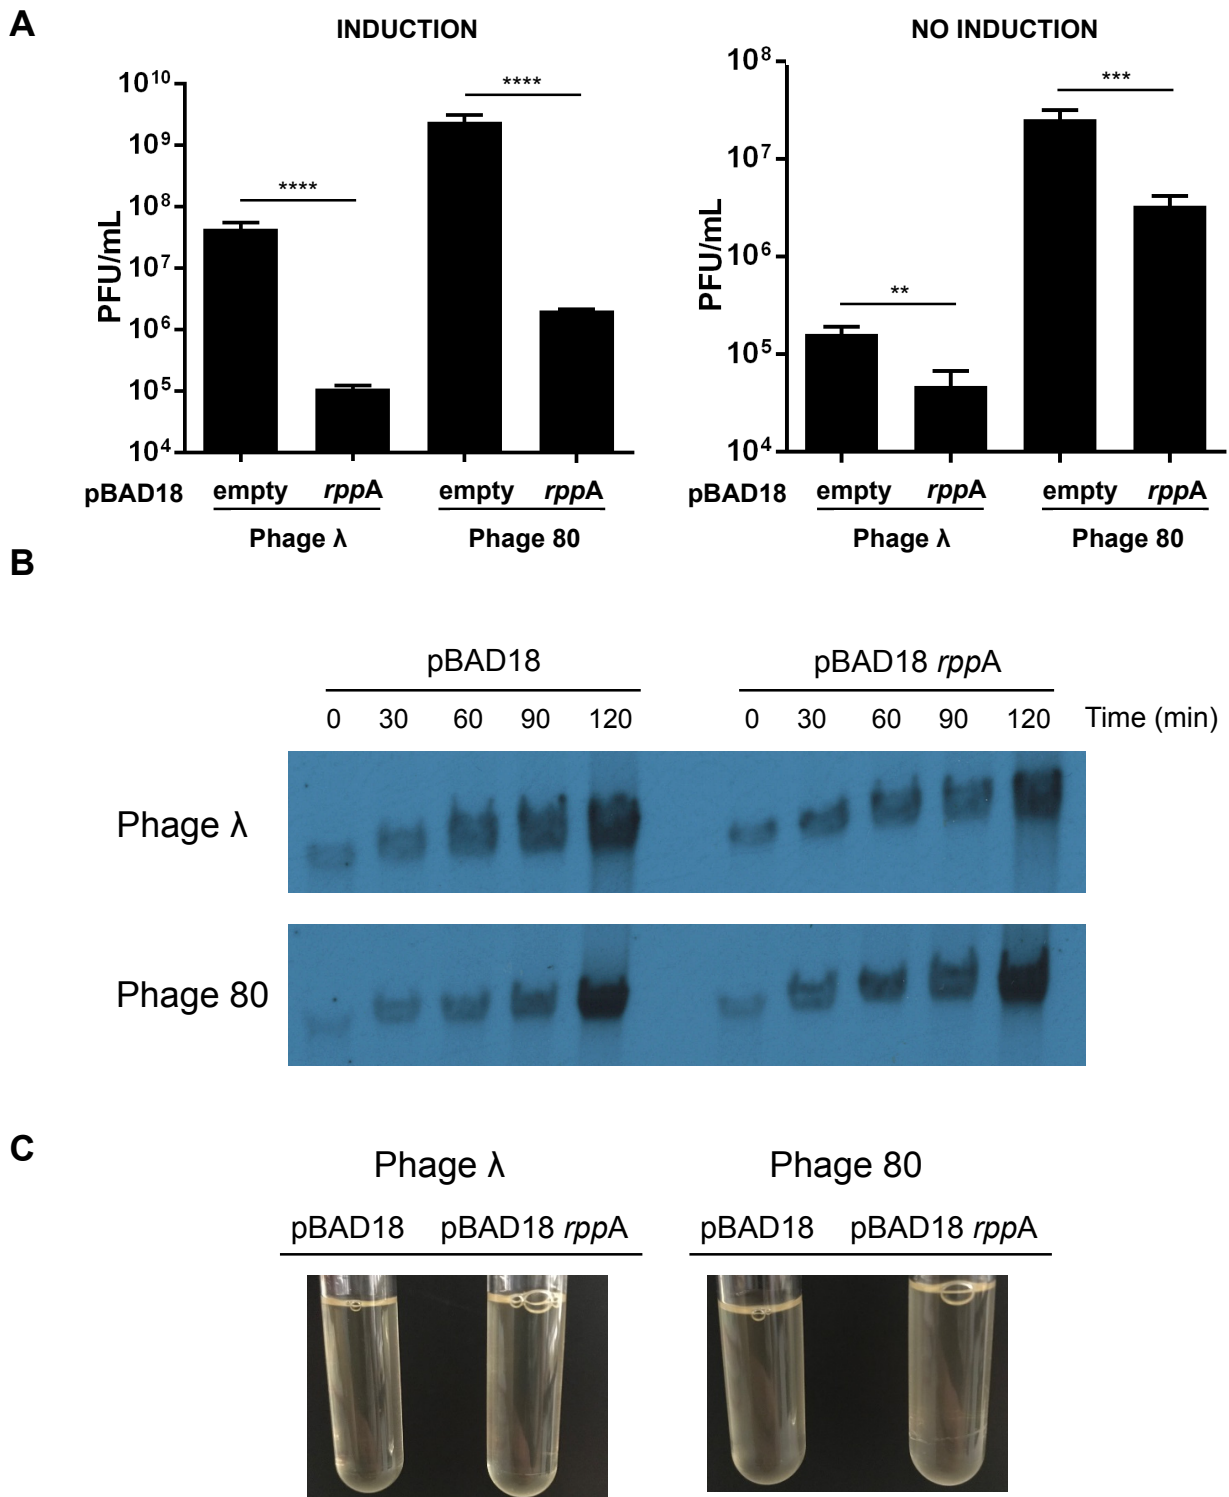

**Figure S3. Identification of the Rpp target. Related to Figure 2.**

(A) Lysogenic strains for phage λ or 80, carrying plasmid pBAD18 empty or expressing RppA, were induced (left) or not (right) with MC, and the titre of the phage analysed. Expression of RppA from plasmid pBAD18 was induced using 0.02% arabinose when appropriate. The experiment shows the no. of plaques/mL of lysate, using *E. coli* 594 as recipient strain. The means of results and standard deviation from three independent experiments are presented (n=3). An unpaired t-test was performed to compare mean differences within rows. Adjusted *p* values were as follows:  $p < 0.0001$ \*\*\*\*,  $p = 0.0006$ \*\*\*,  $p = 0.0079$ \*\*.

(B) Phage replication after expression of the cloned *rppA* gene. Lysogenic strains for phage λ or 80 carrying plasmid pBAD18 empty or expressing RppA, were induced and one millilitre of each culture at different time points after induction was collected and used to prepare standard minilyates, which were resolved on a 0.7% agarose gel, Southern blotted and probed for phage DNA.

(C) RppA does not affect phage lysis. Lysogenic strains for for phage λ or 80, carrying plasmid pBAD18 empty or expressing RppA, were MC induced and photographed 6 h after induction.

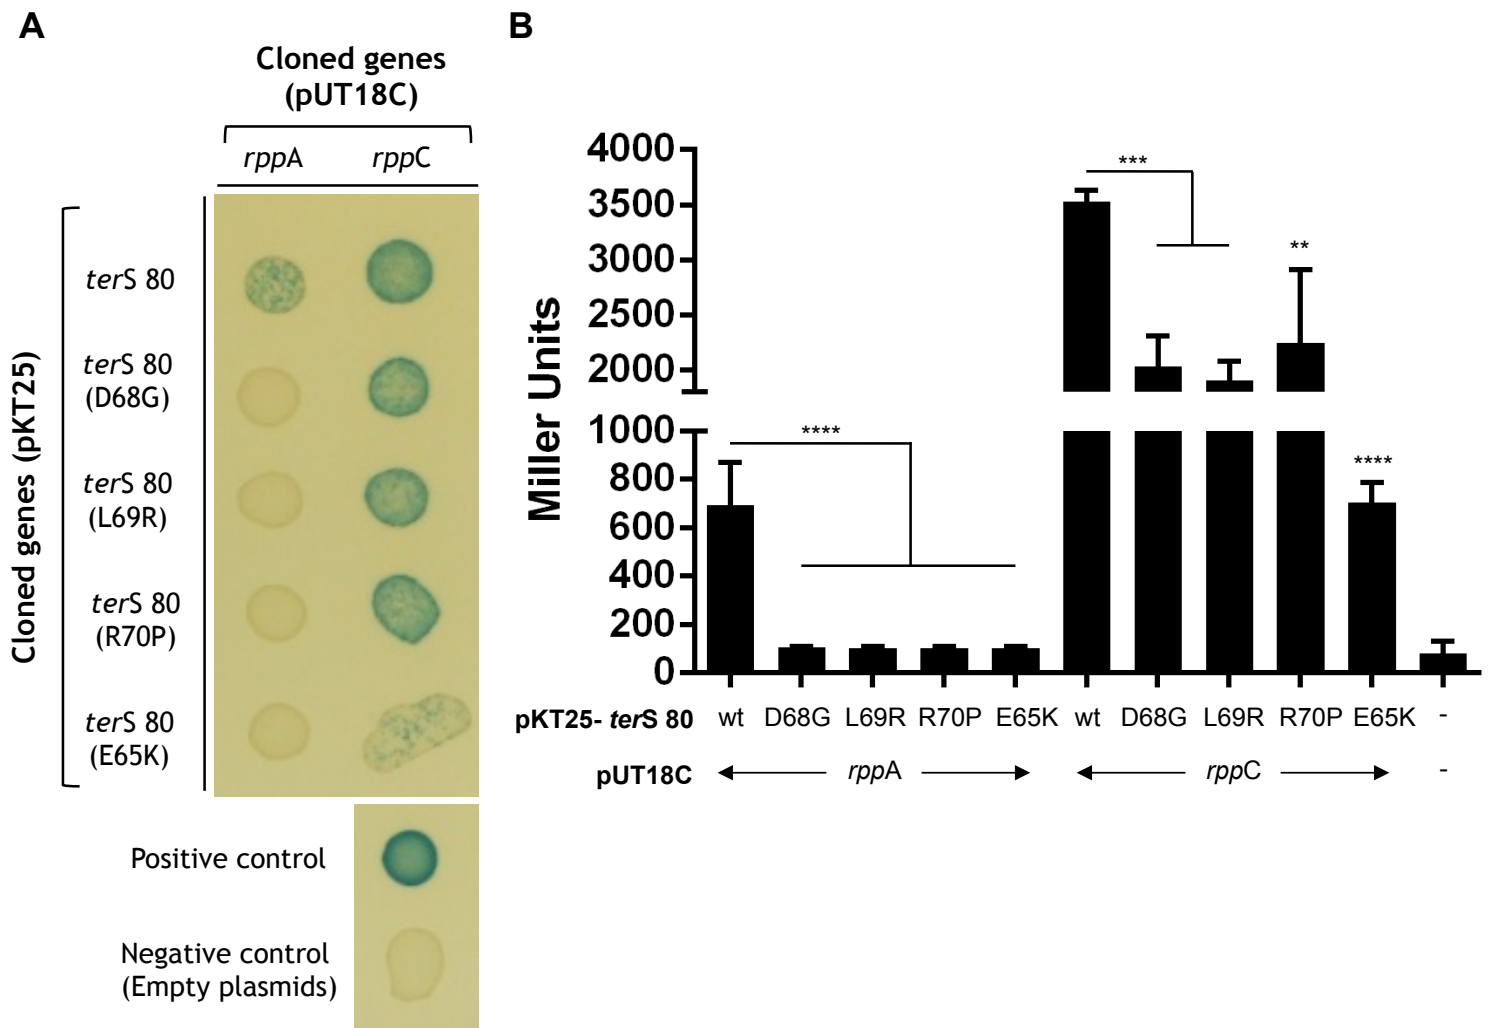

**Figure S4. Characterisation of the phage 80 TerS-Rpp interaction. Related to Figures 2 and 3.**

(A) BACTH analysis was performed using the plasmid pKT25 encoding different phage 80 *terS* versions (wt, D68G, L69R, R70P and E65K) and plasmid pUT18C encoding *rppA* or *rppC*. Different plasmid combinations are indicated.

(B) Quantification of the BACTH analysis after overnight induction with 0.5mM IPTG. The means of results and standard deviation from three independent experiments are presented (n=3). A 1-way ANOVA with Dunnett's multiple comparisons test was performed to compare mean differences between empty plasmids. Adjusted *p* values were as follows: *rppC-terS* 80 wt vs *rppC-terS* 80 D68G  $p=0.0010^{***}$ , *rppC-terS* 80 wt vs *rppC-terS* 80 L69R  $p=0.0005^{***}$ , *rppC-terS* 80 wt vs *rppC-terS* 80 R70P  $p=0.0029^{**}$ ,  $p<0.0001^{****}$ .

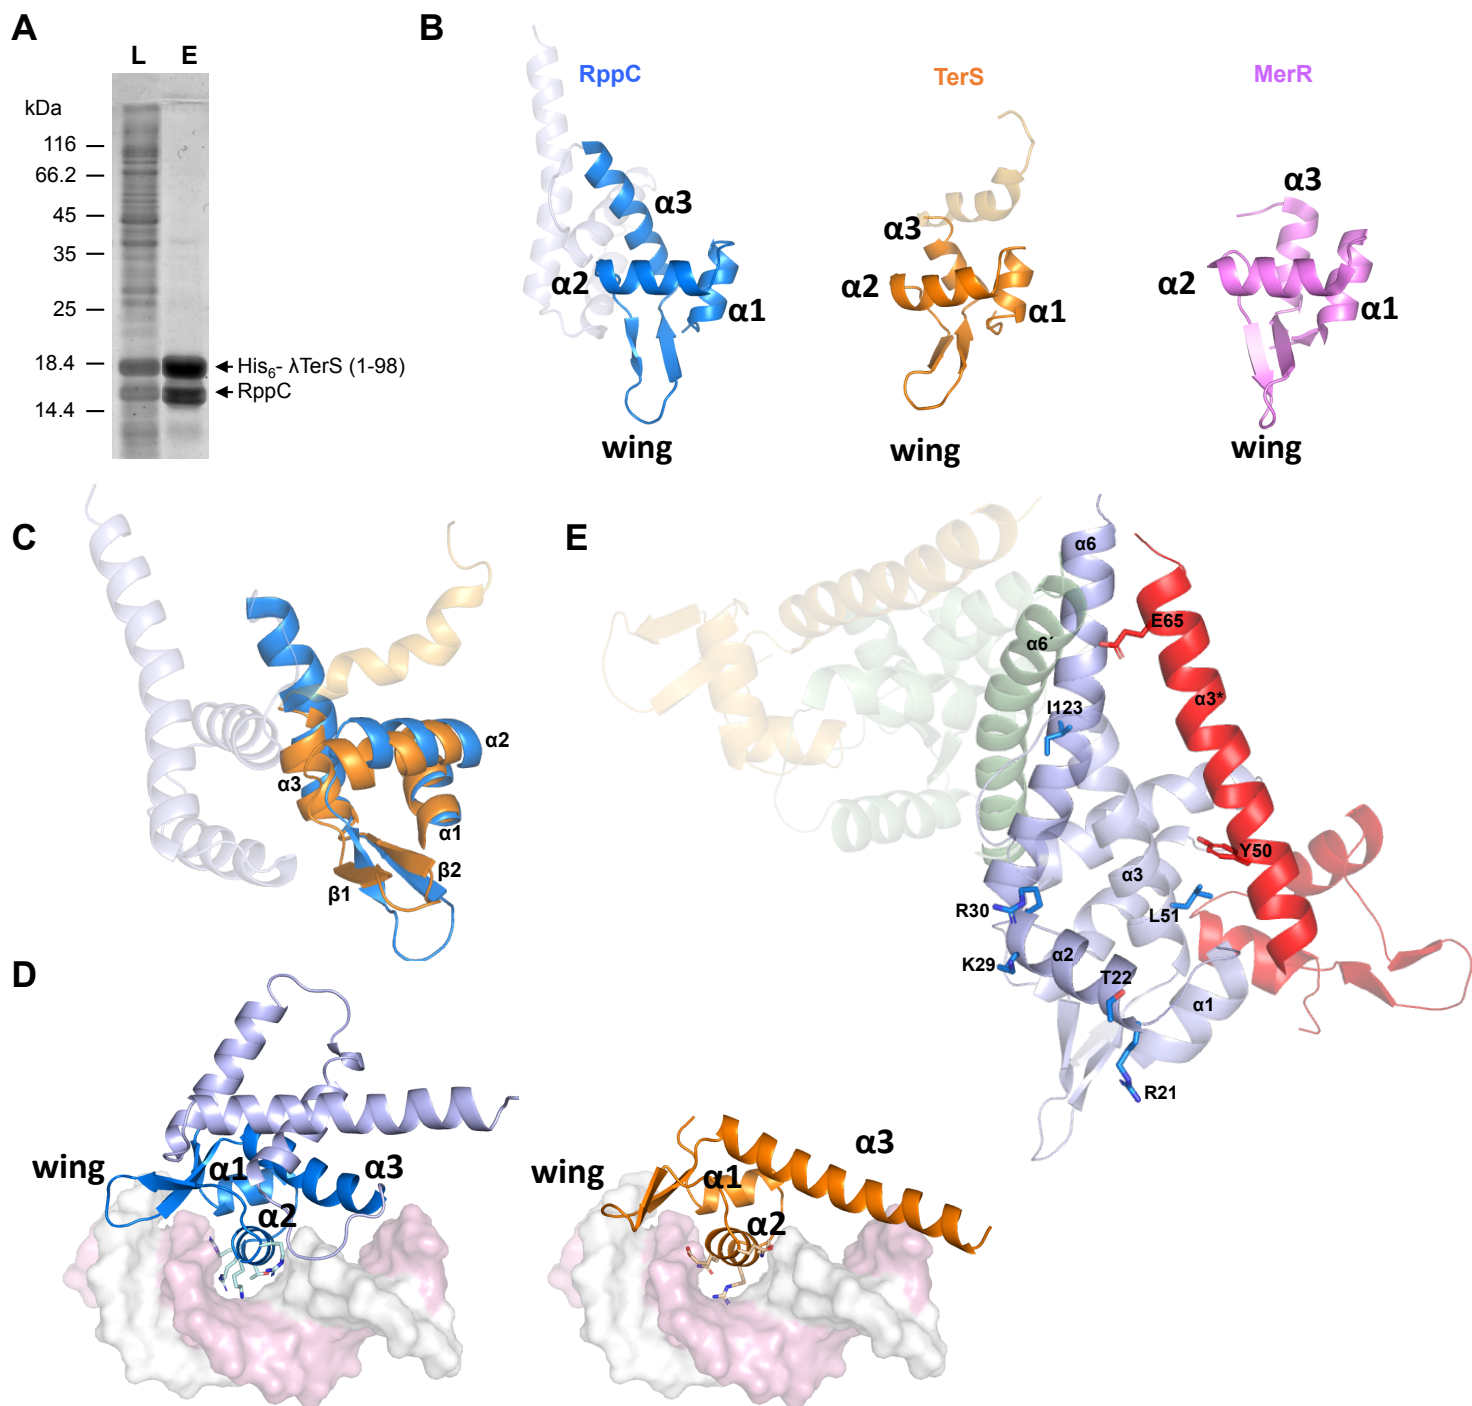

**Figure S5. Characterisation of the RppA-TerS interaction. Related to Figures 2, 4, 5 and 6.**

(A) RppC interacts with  $\lambda$  TerS (1-98). Affinity chromatography of untagged RppC using His<sub>6</sub>- $\lambda$  TerS (residues 1-98). The presence of the different proteins was monitored in the load (lane L), flow-through, wash and elute (lane E) fractions by Coomassie staining.

(B) RppC DBD presents a canonical winged helix-turn-helix DNA binding domain similar to that present in the TerS DBD and in other DNA binding proteins as the MerR transcriptional regulator (PDB 6ama). The wHTH motif from each protein is highlighted in dark tone and the secondary structural elements are labelled in order from N- to C-terminus.

(C) Superimposition of the DNA binding motifs from RppC (blue) and  $\lambda$  TerS DBD (orange) shows identical folding.

(D) Model of RppC-DNA and  $\lambda$ TerS-DNA complexes. Cartoon representation of RppC-DNA (left) and  $\lambda$ TerS-DNA (right) models. RppC and  $\lambda$ TerS<sup>1-98</sup> are coloured in blue and orange, respectively, with the DBD highlighted in dark tone. Secondary structural elements of the DBDs are labelled in order from N- to C-terminus. The DNA binding models show a common DNA recognition and binding strategy with the helix 2 inserting into the DNA major groove and the wing in the minor groove. The RppC residues placed in these facing secondary structural elements are responsible of the specific PIC1 *cosB* sequence recognition (R21, T22, R25, K29, R30, from  $\alpha$ 2, represented in stick, and residues K39 and K41 from the wing), while the equivalent residues present in the  $\lambda$  TerS are involved in the specific recognition of the phage *cosB* site.

(E) Location of the mutated residues in the RppC- $\lambda$ TerS<sup>1-98</sup> heterocomplex structure. Cartoon representation of the RppC- $\lambda$ TerS<sup>1-98</sup> heterocomplex. RppC protomers are coloured in green and blue, respectively. The  $\lambda$ TerS<sup>1-98</sup> protomers are in red and yellow, respectively. Key secondary structural elements are labelled in order from N- to C-terminus, the apostrophe (') indicates the second RppC molecule and the asterisk (\*) the  $\lambda$ TerS. Mutated residues are labelled and shown in stick representation, with carbon atoms coloured according to the protomer to which they belong. Nitrogen, oxygen and phosphorous atoms are coloured in dark blue, red and orange, respectively.

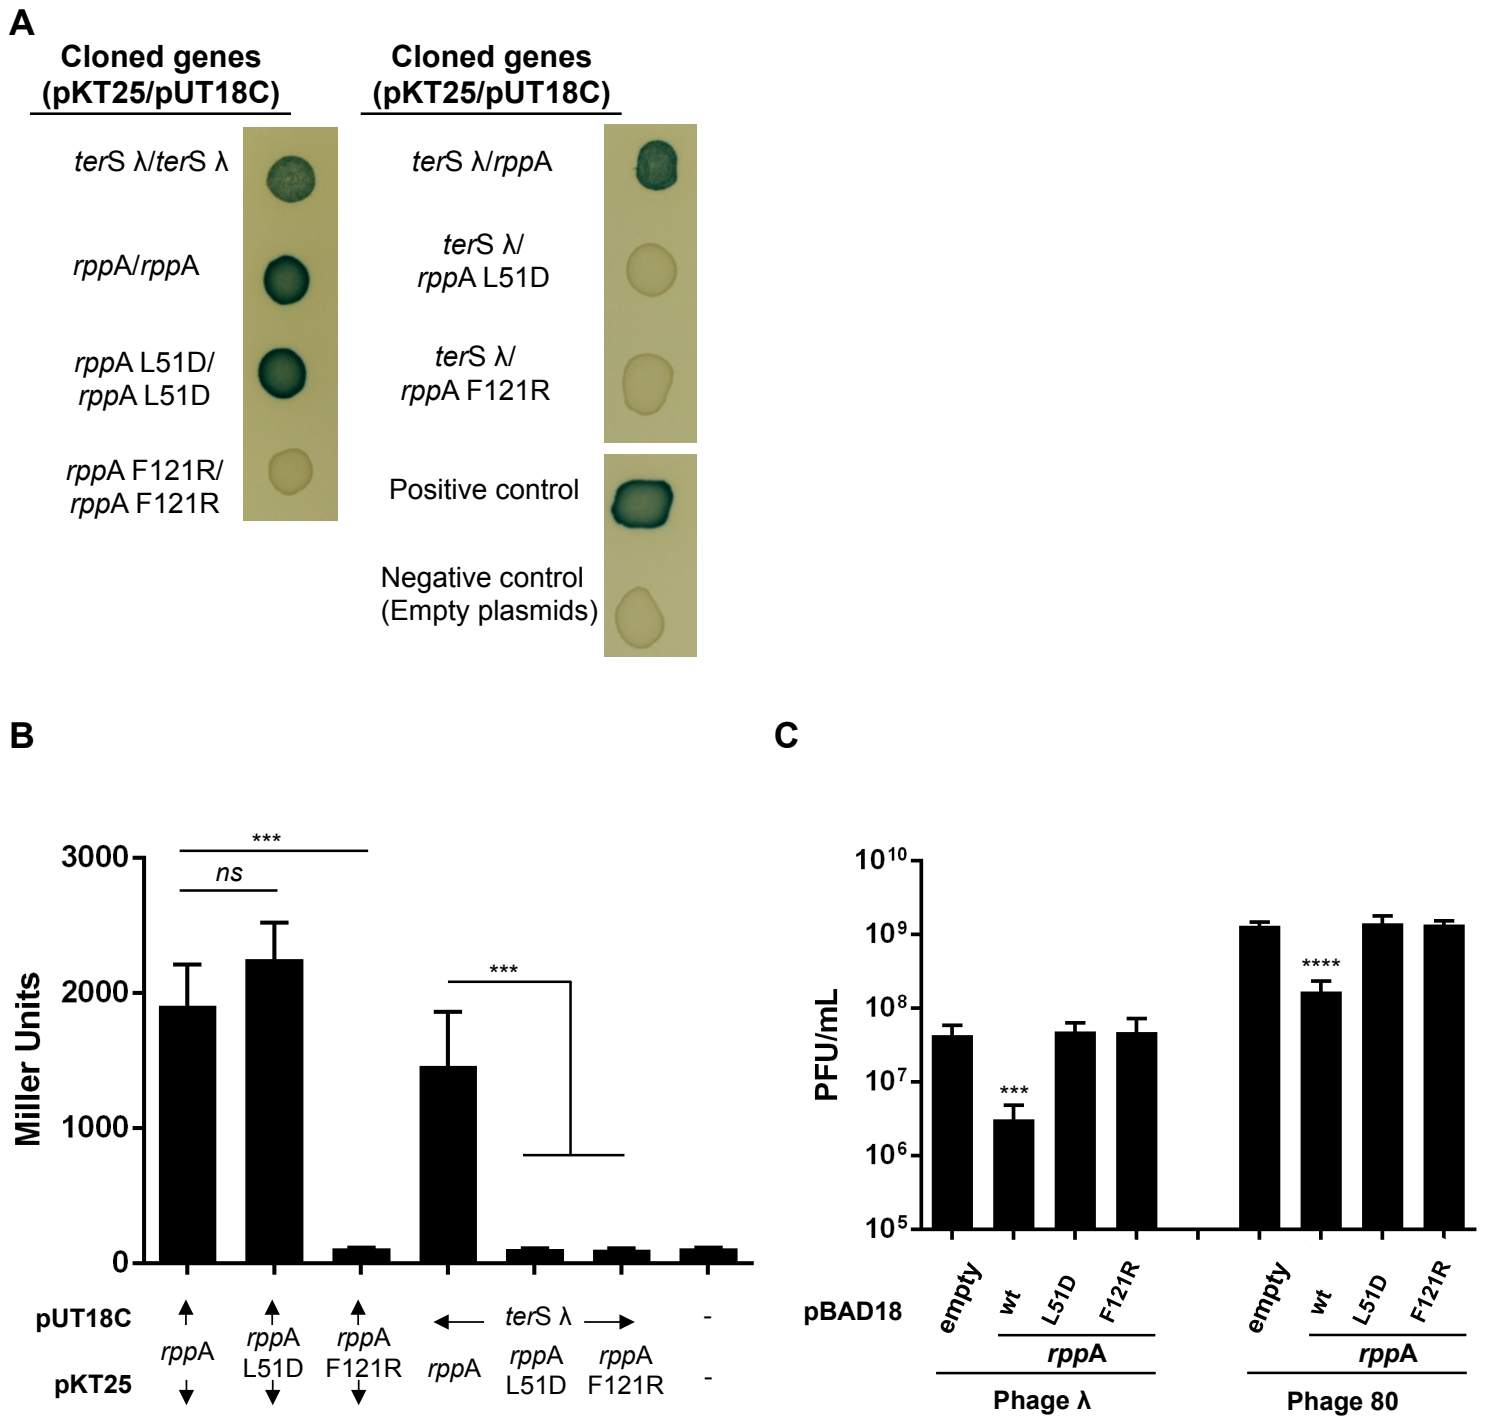

**Figure S6. Characterisation of the RppA L51D and F121R mutants. Related to Figures 3 and 5.**

(A) BACTH analysis was performed using derivative plasmids pKT25 and pUT18C expressing either the  $\lambda$  TerS or the different RppA mutants. Different plasmid combinations are indicated.

(B) Quantification of the BACTH analysis after overnight induction with 0.5mM IPTG. The means of results and standard deviation from three independent experiments are presented (n=3). A 1-way ANOVA with Dunnett's multiple comparisons test was performed to compare mean differences between *rppA* and *rppA* versions or *terS*  $\lambda$ -*rppA* and *terS*  $\lambda$ -different *rppA* versions. Adjusted *p* values were as follows: *rppA*-*rppA* vs *rppA* F121R-*rppA* F121R *p*=0.0002\*\*\*, *terS*-*rppA* vs *terS*-*rppA* L51D/F121R *p*=0.0007\*\*\*. *ns*, not significant.

(C) The RppA mutants do not block phage reproduction. *E. coli* strains expressing different RppA mutant proteins were infected with phages  $\lambda$  80 and plated on phage base agar plates supplemented with 0.1% arabinose using phage top agar. Plates were incubated for 24 h at 37°C, and the number of phage plaques quantified. The means of results and standard deviation from three independent experiments are presented (n=3). A 1-way ANOVA with Dunnett's multiple comparisons test was performed to compare mean differences between pBAD18 empty row. Adjusted *p* values were as follows: *p*=0.0003\*\*\*, *p*<0.0001\*\*\*\*.

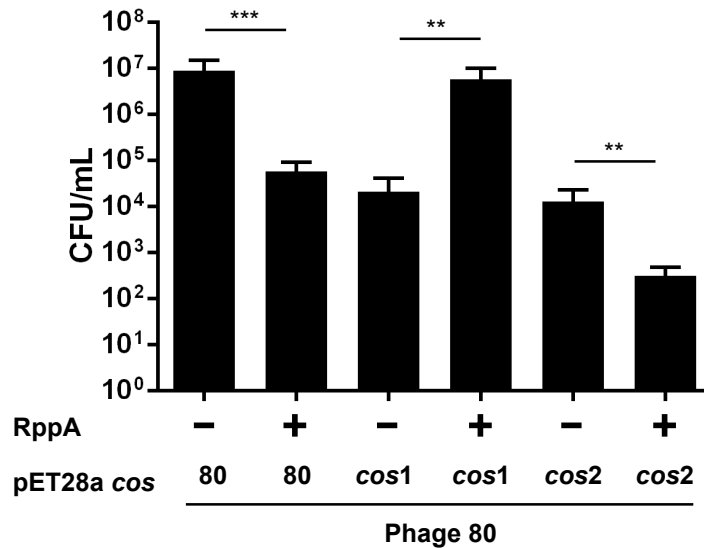

**Figure S7. RppA promotes EcCICFT073 cos1 recognition. Related to Figure 6.**

pET28a derivative plasmids, containing different *cos* sequences (80, *cos1* or *cos2*) were introduced into the lysogenic strains for phage 80. The strains were MC induced (2 µg/ml) and the transfer of the plasmids analysed in presence or absence of RppA. Expression of RppA from plasmid pBAD18-15A was induced using 0.02% arabinose when appropriate. The figure shows the number of transductants/mL of lysate, using *E. coli* WG5 as recipient strain. The means of results and standard deviation from three independent experiments are presented (n=3). An unpaired *t*-test was performed to compare mean differences of each pET28a *cos* plasmid in presence (+) or absence (-) or *rppA*. Adjusted *p* values were as follows: Phage 80 pET28a *cos* 80 (+) vs (-)  $p=0.0006^{***}$ , Phage 80 pET28a *cos1* (+) vs (-)  $p=0.0014^{**}$ , Phage 80 pET28a *cos2* (+) vs (-)  $p=0.0033^{**}$ .



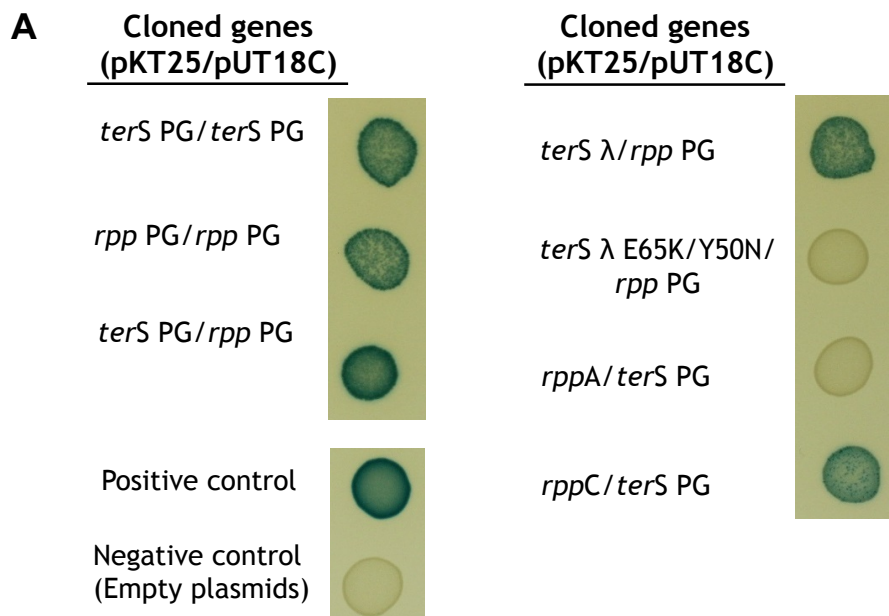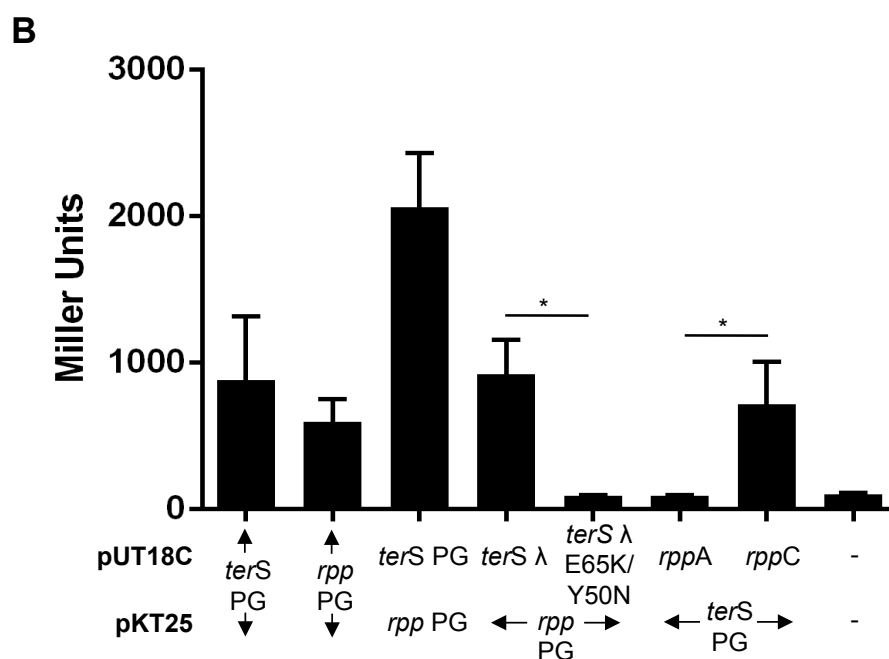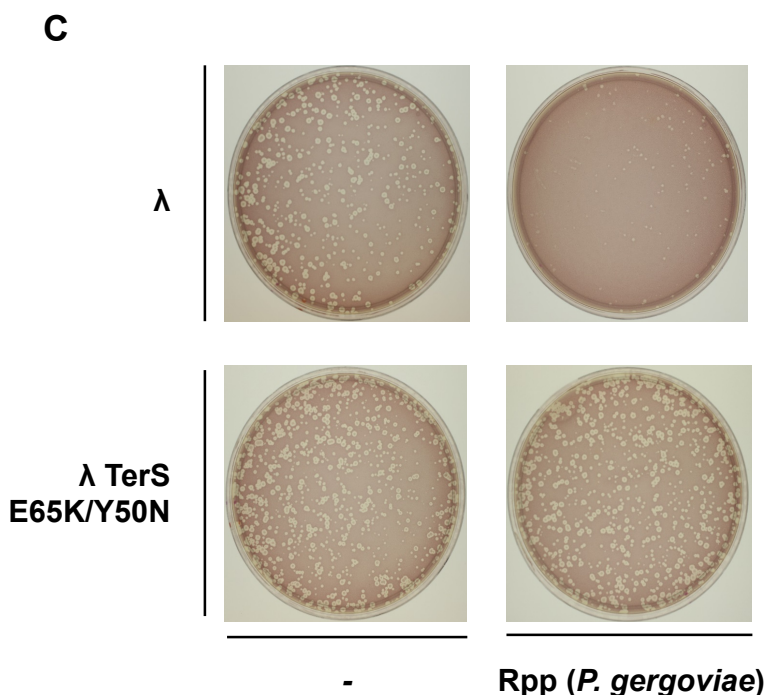

**Figure S8. Testing the Rpp-TerS interaction in *Pluralibacter gergoviae*. Related to Figures 2 and 5.**

(A) BACTH analysis was performed using the plasmids pKT25 and pUT18C encoding *P. gergoviae* *terS* (KMK30155.1) and *rpp* (WP\_086499225) or *E. coli* *terS* λ, *rppA* or *rppC*. Different plasmid combinations are indicated.

(B) Quantification of the BACTH analysis after overnight induction with 0.5mM of IPTG. The means of results and standard deviation from three independent experiments are presented (n=3). An unpaired t-test was performed to compare mean differences within rows. Adjusted *p* values were as follows: *terS* λ-*rpp* PG vs *terS* λ E65K/Y50N-*rpp* PG *p*=0.0108\*, *rppA*-*terS* PG vs *rppC*-*terS* PG *p*=0.0204\*.

(C) Rpp from *Pluralibacter gergoviae* interferes with λ reproduction. *E. coli* strains JP13131 (594 pBAD18 empty) or JP18876 (594 pBAD18 *rpp* PG) were infected with phage λ, plated on phage bottom agar and incubated for 24 h at 37 °C. Plates were stained with 0.1% (w/v) TTC in LB and photographed.

**Table S1. Identification of Rpp proteins in Gram-negative PICIs. Related to Figures 1 and S1.**

| <b>Specie</b>                  | <b>Strain</b>  | <b>Accession number</b>     |
|--------------------------------|----------------|-----------------------------|
| <i>E. coli</i>                 | CFT073         | AAN79972.1 <sup>a</sup>     |
| <i>E. coli</i>                 | K1516          | EZB64746.1                  |
| <i>E. coli</i>                 | O42            | CBG34579.1 <sup>a</sup>     |
| <i>E. coli</i>                 | upec-187       | WP_033562019                |
| <i>E. coli</i>                 | EC2733.1       | WP_072135240.1 <sup>b</sup> |
| <i>Shigella boydii</i>         | Sb277          | ABB66699.1                  |
| <i>Shigella dysenteriae</i>    | DMB SH20201    | RIE73627.1                  |
| <i>Shigella flexneri</i>       | CDC 796-83 SGF | EFW59515.1                  |
| <i>Shigella sonnei</i>         | sh1475         | SJK45406.1                  |
| <i>Salmonella enterica</i>     | BCW_2636       | WP_080171664.1              |
| <i>Pluralibacter gergoviae</i> | MGH173         | OUF48099.1                  |

<sup>a</sup>The protein deposited in the GenBank lacks the first 31 residues.

<sup>b</sup>The protein deposited in the GenBank lacks the first 64 residues.

**Table S2. Intersubunit interactions in the RppC dimer. Related to Figure 4.**

| Homodimer RppC     |          |            |                    |          |           |          |
|--------------------|----------|------------|--------------------|----------|-----------|----------|
| RppC subunit A     |          |            | RppC subunit B     |          |           | Distance |
| Structural element | Residue  | Atom type  | Structural element | Residue  | Atom type |          |
| $\alpha 3$         | 63(LEU)  | CA         | $\alpha 6$         | 133(ARG) | CD        | 3.84     |
|                    |          | C          |                    |          | CZ        | 3.66     |
|                    |          | CD2        |                    |          | 3.77      |          |
|                    | 64(GLY)  | C          |                    | 129(LEU) | CD2       | 3.64     |
|                    |          | O          |                    | 132(LYS) | NZ        | 2.62     |
| $\alpha 6$         | 111(ASP) | CB         |                    | 114(ALA) | CB        | 3.92     |
|                    | 114(ALA) | C          |                    | 115(GLN) | CA        | 3.90     |
|                    |          | CB         |                    | 111(ASP) | CB        | 3.92     |
|                    | 115(GLN) | CA         |                    | 114(ALA) | C         | 3.90     |
|                    |          | CG         |                    | 118(GLY) | CA        | 3.96     |
|                    | 118(GLY) | CA         |                    | 115(GLN) | CG        | 3.96     |
|                    |          | C          |                    | 118(GLY) | C         | 3.97     |
|                    |          |            |                    |          | CA        | 3.39     |
|                    |          | 119(ARG)   |                    | CA       | 3.75      |          |
|                    | 119(ARG) | CA         |                    | 118(GLY) | C         | 3.75     |
|                    |          | CG         | 121(GLN)           | CG       | 3.84      |          |
|                    | 121(GLN) | CG         | 119(ARG)           | CG       | 3.84      |          |
|                    | 122(GLY) | CA         | 123(ILE)           | CG1      | 3.91      |          |
|                    |          | C          | 122(GLY)           | C        | 3.53      |          |
|                    | 123(ILE) | CG1        |                    | CA       | 3.91      |          |
|                    | 125(ILE) | CG2        | 125(ILE)           | CG2      | 3.94      |          |
|                    | 126(GLY) | C          | 123(ILE)           | CG1      | 3.94      |          |
|                    | 129(LEU) | CD2        | 126(GLY)           | C        | 3.96      |          |
|                    | 130(THR) | CG2        | 64(GLY)            | C        | 3.64      |          |
|                    | 131(LEU) | CD2        | 130(THR)           | CG2      | 3.85      |          |
|                    |          |            | 131(LEU)           | CD2      | 3.80      |          |
|                    | 132(LYS) | NZ         | 130(THR)           | CG2      | 3.80      |          |
|                    |          |            | 134(LEU)           | CD1      | 3.74      |          |
|                    | 133(ARG) | CD         | $\alpha 3$         | 64(GLY)  | O         | 2.62     |
|                    |          |            |                    | 63(LEU)  | CA        | 3.84     |
|                    |          |            |                    |          | C         | 3.66     |
| 134(LEU)           | CD1      | $\alpha 6$ | CD2                | 3.77     |           |          |
|                    |          |            | 134(LEU)           | CD1      | 3.55      |          |
|                    |          |            | 131(LEU)           | CD2      | 3.74      |          |

Table S3. Intermolecular interactions in the RppC-TerS<sup>Nter</sup> complex. Related to Figure 5.

| Heterocomplex RppC-TerS |            |            |                    |                      |            |          |         |      |      |
|-------------------------|------------|------------|--------------------|----------------------|------------|----------|---------|------|------|
| RppC                    |            |            | TerS               |                      |            |          |         |      |      |
| Structural element      | Residue    | Atom type  | Structural element | Residue              | Atom type  | Distance |         |      |      |
| $\alpha 1$              | 6(PHE)     | CD1        | $L\alpha 1$        | 1(MET)               | CE         | 3.88     |         |      |      |
|                         |            | CZ         |                    | 3(VAL)               | CG1        | 3.53     |         |      |      |
|                         |            |            | CE2                | $L\alpha 1-\alpha 2$ | 11(ILE)    | CD1      | 3.74    |      |      |
|                         |            | 7(GLN)     |                    | $\alpha 1$           | CD         | 3.94     |         |      |      |
|                         |            |            |                    |                      | CB         | 3.52     |         |      |      |
|                         |            |            |                    |                      | CG         | 3.74     |         |      |      |
|                         |            | CD         |                    |                      | 3.98       |          |         |      |      |
|                         |            | 11(ILE)    |                    |                      | CD1        | 3.36     |         |      |      |
|                         |            |            | CG1                |                      | 3.65       |          |         |      |      |
|                         |            |            |                    | 3.97                 |            |          |         |      |      |
|                         | CD1        |            | 3.60               |                      |            |          |         |      |      |
|                         | CD1        | 3.83       |                    |                      |            |          |         |      |      |
|                         | CD2        | 3.40       |                    |                      |            |          |         |      |      |
|                         | CG1        | 3.16       |                    |                      |            |          |         |      |      |
| 16(GLN)                 | NE2        | $\alpha 3$ | 43(SER)            | OG                   | 2.62       |          |         |      |      |
| $\alpha 2$              | 47(LEU)    | CB         | $\alpha 1$         | 11(ILE)              | CG2        | 3.64     |         |      |      |
|                         |            |            |                    |                      | CG         | 3.57     |         |      |      |
|                         | CD2        | 3.74       |                    |                      |            |          |         |      |      |
|                         | 51(LEU)    | CD2        | 12(PHE)            | CE1                  | 3.61       |          |         |      |      |
|                         |            |            | 50(TYR)            | CD2                  | 3.72       |          |         |      |      |
|                         | 3.90       |            |                    |                      |            |          |         |      |      |
|                         | 52(PHE)    | CE1        |                    | CZ                   | 3.92       |          |         |      |      |
| 55(ARG)                 | CD         | 51(ALA)    | CB                 | 3.80                 |            |          |         |      |      |
|                         | NE         | 54(ASP)    | OD1                | 3.00                 |            |          |         |      |      |
| 63(LEU)                 | CD1        | 58(GLU)    | CD                 | 3.78                 |            |          |         |      |      |
| 77(HIS)                 | CE1        | CD         | 3.77               |                      |            |          |         |      |      |
| $\alpha 3$              | 81(ILE)    | CG2        | $\alpha 3$         | 57(ILE)              | CG2        | 3.89     |         |      |      |
|                         |            | CD1        |                    | 61(LYS)              | CE         | 3.91     |         |      |      |
|                         | 82(MET)    | CE         |                    | 22(TRP)              | CH2        | 3.98     |         |      |      |
|                         |            | O          |                    |                      | NE1        | 2.72     |         |      |      |
|                         | 85(MET)    | CG         |                    | CZ2                  | 3.76       |          |         |      |      |
|                         |            | CE         |                    | 53(ARG)              | CG         | 3.02     |         |      |      |
|                         |            |            |                    | CD                   | 3.62       |          |         |      |      |
|                         |            | CB         |                    | 57(ILE)              | CD1        | 2.28     |         |      |      |
|                         | $\alpha 4$ | 95(TYR)    |                    | CE1                  | $\alpha 2$ | 15(SER)  | 53(ARG) | CZ   | 3.60 |
|                         |            |            |                    | CE2                  |            |          | 14(ALA) | C    | 3.67 |
| CZ                      |            |            | CA                 | 3.52                 |            |          |         |      |      |
| $\alpha 6$              | 127(ARG)   | NH2        | $\alpha 3$         | 61(LYS)              | O          | 2.82     |         |      |      |
|                         |            |            |                    |                      | OE1        | 2.97     |         |      |      |
|                         | 133'(ARG)  |            |                    |                      | NE         | 65(GLU)  | OE1     | 2.85 |      |
|                         |            |            |                    |                      |            |          | NH1     | OE1  | 2.65 |

L = loop

**Table S4. Strains used in this study. Related to STAR Methods.**

| Strain       | Description                                                 | Reference                   |
|--------------|-------------------------------------------------------------|-----------------------------|
| 594          | Laboratory strain                                           |                             |
| C600         | Laboratory strain                                           | ATCC 23738                  |
| WG5          | Laboratory strain                                           |                             |
| DH5 $\alpha$ | Laboratory strain                                           |                             |
| BTH101       | Bacterial Adenylate CyclaseTwo-hybrid System Kit            | Euromedex                   |
| BL21 (DE3)   | Protein overexpression                                      | Novagen                     |
| JP10400      | C600 phage lambda lysogen                                   | (Fillol-Salom et al., 2018) |
| JP12507      | 594 phage 80 lysogen                                        | (Fillol-Salom et al., 2018) |
| JP12508      | 594 phage HK97 lysogen                                      | This work                   |
| JP13131      | 594 pBAD18                                                  | This work                   |
| JP19328      | 594 pJP2214                                                 | This work                   |
| JP19329      | 594 pJP2215                                                 | This work                   |
| JP19330      | 594 pJP2216                                                 | This work                   |
| JP13132      | 594 pJP2217                                                 | This work                   |
| JP13133      | 594 pJP2218                                                 | This work                   |
| JP13134      | 594 pJP2219                                                 | This work                   |
| JP13135      | 594 pJP2220                                                 | This work                   |
| JP13136      | 594 pJP2221                                                 | This work                   |
| JP13137      | 594 pJP2222                                                 | This work                   |
| JP12677      | C600 EcCICFT073-c1501::tetA                                 | (Fillol-Salom et al., 2018) |
| JP13957      | C600 EcCICFT073-c1501::tetA $\Delta$ c1503                  | This work                   |
| JP16526      | 594 pJP2243                                                 | This work                   |
| JP16528      | 594 pJP2304                                                 | This work                   |
| JP12979      | C600 lambda evolved-EcCICFT073::tetA ( <i>nu1</i> -V3I)     | This work                   |
| JP12982      | C600 lambda evolved-EcCICFT073::tetA ( <i>nu1</i> -A55V)    | This work                   |
| JP12993      | C600 lambda evolved-pBAD18 <i>rppA</i> ( <i>nu1</i> -E65K)  | This work                   |
| JP16575      | JP12993 evolved-pBAD18 <i>rppC</i> ( <i>nu1</i> -E65K/Y50N) | This work                   |
| JP13173      | 594 phage 80 evolved-pBAD18 <i>rppA</i> (1) (gp01-D68G)     | This work                   |
| JP17583      | 594 phage 80 evolved-pBAD18 <i>rppA</i> (2) (gp01-L69R)     | This work                   |
| JP17545      | 594 phage 80 evolved-pBAD18 <i>rppA</i> (3) (gp01-R70P)     | This work                   |
| JP16571      | 594 phage 80 evolved-pBAD18 <i>rppC</i> (gp01-E65K)         | This work                   |
| JP15009      | JP10400 pBAD18                                              | This work                   |
| JP15012      | JP10400 pJP2218                                             | This work                   |
| JP15013      | JP12507 pBAD18                                              | This work                   |
| JP15016      | JP12507 pJP2218                                             | This work                   |
| JP19363      | BTH101 pJP2225 pJP2224                                      | This work                   |
| JP19364      | BTH101 pJP2228 pJP2224                                      | This work                   |
| JP19365      | BTH101 pJP2262 pJP2224                                      | This work                   |
| JP19366      | BTH101 pJP2225 pJP2244                                      | This work                   |
| JP19367      | BTH101 pJP2228 pJP2244                                      | This work                   |
| JP19368      | BTH101 pJP2262 pJP2244                                      | This work                   |
| JP19369      | BTH101 pKT25-control pUT18C-control                         | This work                   |
| JP19370      | BTH101 pKT25 pUT18C                                         | This work                   |
| JP19388      | BTH101 pJP2225 pJP2250                                      | This work                   |
| JP19389      | BTH101 pJP2249 pJP2224                                      | This work                   |
| JP19390      | BTH101 pJP2245 pJP2244                                      | This work                   |
| JP19391      | BTH101 pJP2249 pJP2244                                      | This work                   |
| JP19371      | BTH101 pJP2229 pJP2224                                      | This work                   |
| JP19372      | BTH101 pJP2230 pJP2224                                      | This work                   |
| JP19373      | BTH101 pJP2231 pJP2224                                      | This work                   |
| JP19374      | BTH101 pJP2232 pJP2224                                      | This work                   |

| Strain  | Description                                                          | Reference |
|---------|----------------------------------------------------------------------|-----------|
| JP19375 | BTH101 pJP2305 pJP2224                                               | This work |
| JP19376 | BTH101 pJP2229 pJP2244                                               | This work |
| JP19377 | BTH101 pJP2230 pJP2244                                               | This work |
| JP19378 | BTH101 pJP2231 pJP2244                                               | This work |
| JP19379 | BTH101 pJP2232 pJP2244                                               | This work |
| JP19380 | BTH101 pJP2305 pJP2244                                               | This work |
| JP13413 | JP10400 EcCICFT073-c1504-07::cat                                     | This work |
| JP15342 | JP10400 EcCICFT073-c1504-07::cat c1503*                              | This work |
| JP13891 | JP12507 EcCICFT073-c1504-07::cat                                     | This work |
| JP15377 | JP12507 EcCICFT073-c1504-07::cat c1503*                              | This work |
| JP15293 | JP12979 EcCICFT073-c1504-07::cat                                     | This work |
| JP15294 | JP12993 EcCICFT073-c1504-07::cat                                     | This work |
| JP15295 | JP12982 EcCICFT073-c1504-07::cat                                     | This work |
| JP15325 | JP13173 EcCICFT073-c1504-07::cat                                     | This work |
| JP17617 | JP17583 EcCICFT073-c1504-07::cat                                     | This work |
| JP17618 | JP17545 EcCICFT073-c1504-07::cat                                     | This work |
| JP19394 | BTH101 pJP2258 pJP2255                                               | This work |
| JP19395 | BTH101 pJP2259 pJP2256                                               | This work |
| JP19397 | BTH101 pJP2225 pJP2255                                               | This work |
| JP19398 | BTH101 pJP2225 pJP2256                                               | This work |
| JP19332 | 594 pJP2252                                                          | This work |
| JP19333 | 594 pJP2253                                                          | This work |
| JP15839 | JP10400 EcCICFT073-c1504-07::cat c1503 L51D                          | This work |
| JP18258 | JP10400 EcCICFT073-c1504-07::cat c1503 F121R                         | This work |
| JP15961 | JP12507 EcCICFT073-c1504-07::cat c1503 L51D                          | This work |
| JP18084 | JP12507 EcCICFT073-c1504-07::cat c1503 F121R                         | This work |
| JP15994 | JP10400 pJP2030 pJP2233                                              | This work |
| JP15995 | JP10400 pJP2030 pJP2234                                              | This work |
| JP15996 | JP10400 pJP2033 pJP2233                                              | This work |
| JP15997 | JP10400 pJP2033 pJP2234                                              | This work |
| JP15998 | JP10400 pJP2034 pJP2233                                              | This work |
| JP15999 | JP10400 pJP2034 pJP2234                                              | This work |
| JP16012 | JP12507 pJP2031 pJP2233                                              | This work |
| JP16013 | JP12507 pJP2031 pJP2234                                              | This work |
| JP16014 | JP12507 pJP2033 pJP2233                                              | This work |
| JP16015 | JP12507 pJP2033 pJP2234                                              | This work |
| JP16016 | JP12507 pJP2034 pJP2233                                              | This work |
| JP16017 | JP12507 pJP2034 pJP2234                                              | This work |
| JP16000 | JP10400 pJP2035 pJP2233                                              | This work |
| JP16001 | JP10400 pJP2035 pJP2234                                              | This work |
| JP16002 | JP10400 pJP2036 pJP2233                                              | This work |
| JP16003 | JP10400 pJP2036 pJP2234                                              | This work |
| JP19697 | JP10400 pJP2033 pJP2311                                              | This work |
| JP16578 | 594 phage 80 orf63-orf64:cat chimera cosB:cos1<br>EcCICFT073 pBAD18  | This work |
| JP16579 | 594 phage 80 orf63-orf64:cat chimera cosB:cos1<br>EcCICFT073 pJP2218 | This work |
| JP19401 | BTH101 pJP2306 pJP2308                                               | This work |
| JP19402 | BTH101 pJP2306 pJP2309                                               | This work |
| JP19404 | BTH101 pJP2307 pJP2309                                               | This work |
| JP19405 | BTH101 pJP2225 pJP2309                                               | This work |
| JP19406 | BTH101 pJP2262 pJP2309                                               | This work |
| JP19407 | BTH101 pJP2249 pJP2308                                               | This work |

| <b>Strain</b> | <b>Description</b>     | <b>Reference</b> |
|---------------|------------------------|------------------|
| JP19408       | BTH101 pJP2245 pJP2308 | This work        |
| JP18876       | 594 pJP2310            | This work        |

**Table S6. Plasmids used in this study. Related to STAR Methods.**

| <b>Plasmid</b>        | <b>Description</b>                                                                                                                                                              | <b>Reference</b>            |
|-----------------------|---------------------------------------------------------------------------------------------------------------------------------------------------------------------------------|-----------------------------|
| <b>pET28a</b>         | Km <sup>R</sup> . Expression vector                                                                                                                                             | Novagen                     |
| <b>pProEX HTa</b>     | Amp <sup>R</sup> . Expression vector                                                                                                                                            | Life Technologies           |
| <b>pKD46</b>          | Amp <sup>R</sup> . Thermosensitive plasmid with Red system of lambda phage                                                                                                      | (Datsenko and Wanner, 2000) |
| <b>pCP20</b>          | Amp <sup>R</sup> . Thermosensitive plasmid with Red system of lambda phage                                                                                                      | (Datsenko and Wanner, 2000) |
| <b>pWRG717</b>        | Amp <sup>R</sup> , <i>kmR</i> . pBluescript II SK+ derivative, <i>aph</i> resistance cassette and I-SceI cleavage site.                                                         | (Hoffmann et al., 2017)     |
| <b>pWRG99</b>         | Amp <sup>R</sup> . Thermosensitive plasmid with Red system of lambda phage and I-SceI endonuclease under control of tetracycline-inducible promoter ( <i>P<sub>tetA</sub></i> ) | (Blank et al., 2011)        |
| <b>pUT18C</b>         | Amp <sup>R</sup> . Bacterial Adenylate CyclaseTwo-hybrid System Kit                                                                                                             | Euromedex                   |
| <b>pKT25</b>          | Km <sup>R</sup> . Bacterial Adenylate CyclaseTwo-hybrid System Kit                                                                                                              | Euromedex                   |
| <b>pUT18C-control</b> | Amp <sup>R</sup> . Bacterial Adenylate CyclaseTwo-hybrid System Kit                                                                                                             | Euromedex                   |
| <b>pKT25-control</b>  | Km <sup>R</sup> . Bacterial Adenylate CyclaseTwo-hybrid System Kit                                                                                                              | Euromedex                   |
| <b>pBAD18</b>         | Amp <sup>R</sup> . Expression vector                                                                                                                                            | (Guzman et al., 1995)       |
| <b>pJP2233</b>        | pBAD18 derivative, origin of replication 15A. Expression vector. Amp <sup>R</sup>                                                                                               | This work                   |
| <b>pJP2214</b>        | pBAD18 c1499 EcCICFT073                                                                                                                                                         | This work                   |
| <b>pJP2215</b>        | pBAD18 c1500 EcCICFT073                                                                                                                                                         | This work                   |
| <b>pJP2216</b>        | pBAD18 c1501 EcCICFT073                                                                                                                                                         | This work                   |
| <b>pJP2217</b>        | pBAD18 c1502 EcCICFT073                                                                                                                                                         | This work                   |
| <b>pJP2218</b>        | pBAD18 c1503 EcCICFT073                                                                                                                                                         | This work                   |
| <b>pJP2219</b>        | pBAD18 c1504 EcCICFT073                                                                                                                                                         | This work                   |
| <b>pJP2220</b>        | pBAD18 c1505 EcCICFT073                                                                                                                                                         | This work                   |
| <b>pJP2221</b>        | pBAD18 c1506 EcCICFT073                                                                                                                                                         | This work                   |
| <b>pJP2222</b>        | pBAD18 c1507 EcCICFT073                                                                                                                                                         | This work                   |
| <b>pJP2304</b>        | pBAD18 <i>rppB</i>                                                                                                                                                              | This work                   |
| <b>pJP2243</b>        | pBAD18 <i>rppC</i>                                                                                                                                                              | This work                   |
| <b>pJP2225</b>        | pKT25 <i>terS</i> lambda                                                                                                                                                        | This work                   |
| <b>pJP2228</b>        | pKT25 <i>terS</i> lambda E65K                                                                                                                                                   | This work                   |
| <b>pJP2262</b>        | pKT25 <i>terS</i> lambda E65K/Y50N                                                                                                                                              | This work                   |
| <b>pJP2224</b>        | pUT18C <i>rppA</i>                                                                                                                                                              | This work                   |
| <b>pJP2244</b>        | pUT18C <i>rppC</i>                                                                                                                                                              | This work                   |
| <b>pJP2249</b>        | pKT25 <i>rppA</i>                                                                                                                                                               | This work                   |
| <b>pJP2245</b>        | pKT25 <i>rppC</i>                                                                                                                                                               | This work                   |
| <b>pJP2250</b>        | pUT18C <i>terS</i> lambda                                                                                                                                                       | This work                   |
| <b>pJP2229</b>        | pKT25 <i>terS</i> phage 80                                                                                                                                                      | This work                   |
| <b>pJP2230</b>        | pKT25 <i>terS</i> phage 80 D68G                                                                                                                                                 | This work                   |
| <b>pJP2231</b>        | pKT25 <i>terS</i> phage 80 L69R                                                                                                                                                 | This work                   |
| <b>pJP2232</b>        | pKT25 <i>terS</i> phage 80 R70P                                                                                                                                                 | This work                   |
| <b>pJP2305</b>        | pKT25 <i>terS</i> phage 80 E65K                                                                                                                                                 | This work                   |
| <b>pJP2285</b>        | pProEX HTa <i>rppC</i>                                                                                                                                                          | This work                   |
| <b>pJP2286</b>        | pProEX HTa <i>terS</i> lambda(1-98) <i>rppC</i>                                                                                                                                 | This work                   |
| <b>pJP2255</b>        | pUT18C <i>rppA</i> L51D                                                                                                                                                         | This work                   |



| Plasmid | Description                                       | Reference               |
|---------|---------------------------------------------------|-------------------------|
| pJP2256 | pUT18C <i>rppA</i> F121R                          | This work               |
| pJP2258 | pKT25 <i>rppA</i> L51D                            | This work               |
| pJP2259 | pKT25 <i>rppA</i> F121R                           | This work               |
| pJP2252 | pBAD18 <i>rppA</i> L51D                           | This work               |
| pJP2253 | pBAD18 <i>rppA</i> F121R                          | This work               |
| pJP2234 | pBAD18 15A <i>rppA</i>                            | This work               |
| pJP2030 | pET28a <i>cos</i> lambda                          | (Fillol-Salom A., 2018) |
| pJP2031 | pET28a <i>cos</i> phage 80                        | (Fillol-Salom A., 2018) |
| pJP2033 | pET28a <i>cos1</i> EcCICFT073                     | (Fillol-Salom A., 2018) |
| pJP2034 | pET28a <i>cos2</i> EcCICFT073                     | (Fillol-Salom A., 2018) |
| pJP2035 | pET28a <i>cos1-cosB cos2</i> EcCICFT073           | This work               |
| pJP2036 | pET28a <i>cos2-cosB cos1</i> EcCICFT073           | This work               |
| pJP2311 | pBAD18 15A <i>rppA</i> R21A T22A                  | This work               |
| pJP2306 | pKT25 <i>terS</i> <i>Pluralibacter gergoviae</i>  | This work               |
| pJP2307 | pKT25 <i>rpp</i> <i>Pluralibacter gergoviae</i>   | This work               |
| pJP2308 | pUT18C <i>terS</i> <i>Pluralibacter gergoviae</i> | This work               |
| pJP2309 | pUT18C <i>rpp</i> <i>Pluralibacter gergoviae</i>  | This work               |
| pJP2310 | pBAD18 <i>rpp</i> <i>Pluralibacter gergoviae</i>  | This work               |
